# Supplementary material for: Cutaneous Nod2 Expression Regulates the Skin Microbiome and Wound Healing in a Murine Model
Source: PubMed Central journal article supplement (PMC5646944; doi:10.1016/j.jid.2017.05.029), 2017-11
Supplement: mmc1.pdf [file mmc1.pdf]

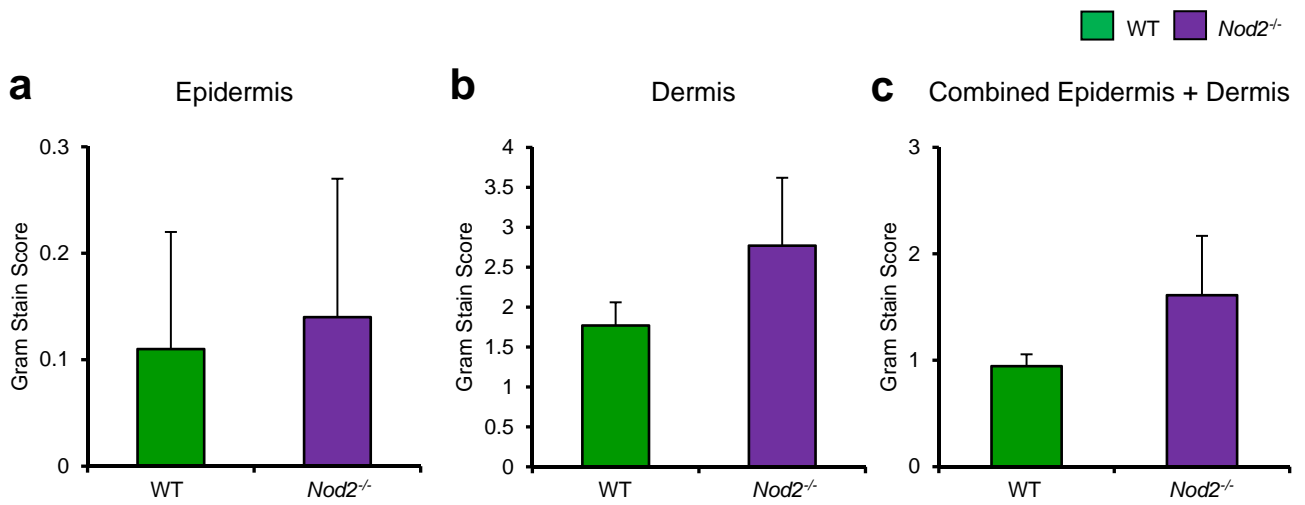

**Supplementary Figure S1. Gram-stain quantification.** Quantification of Gram-staining showed there was a no significant difference in total eubacterial burden in both WT vs. *Nod2*<sup>-/-</sup> normal skin (a) epidermis, (b) dermis and (c) combined epidermal and dermal scores. There was, however, a trend towards altered eubacterial abundance in the dermis (b) of *Nod2*<sup>-/-</sup> normal skin. All data are representative of two independent experiments, with  $n = 5$  mice/group. Mean + standard error of the mean. WT, wild type.

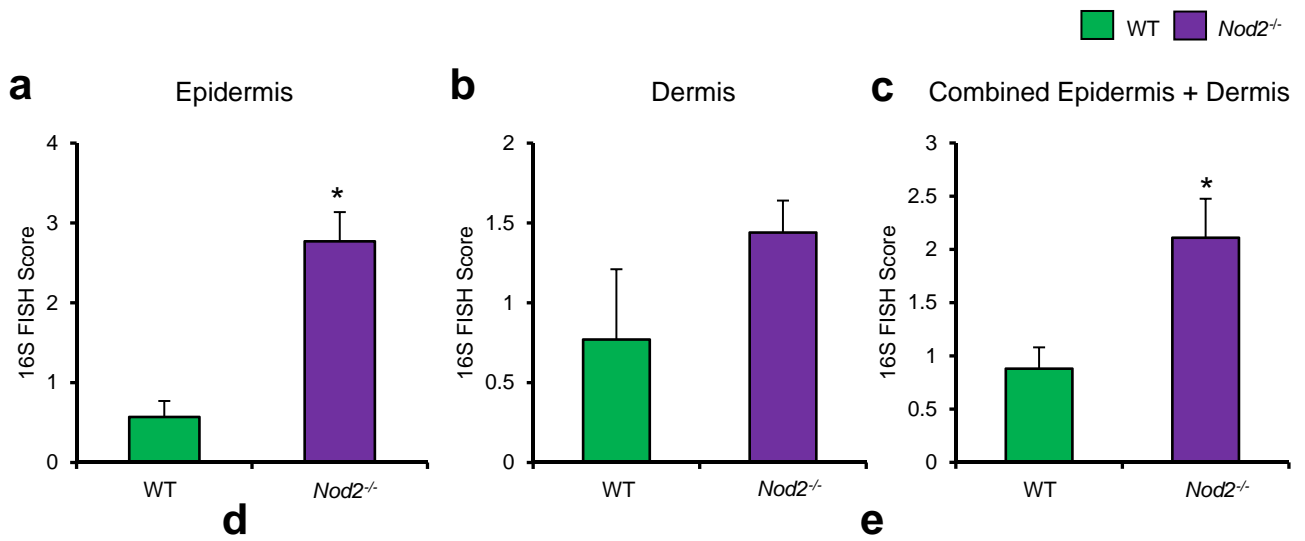

**d** **e**

| Band | WT                                         | <i>Nod2</i> <sup>-/-</sup>                |
|------|--------------------------------------------|-------------------------------------------|
| 1    | <i>Staphylococcus aureus</i> . YP040448    | Uncultured actinbacterium. GCP1           |
| 2    | <i>Staphylococcus epidermidis</i> . D83363 | <i>Pseudomonas</i> sp. AF320988           |
| 3    | <i>Pseudomonas</i> sp. AB013827.           | <i>Pseudomonas fragi</i> . AHZY01000001.  |
| 4    | <i>Actinobacteria</i> sp. cIK1_14b.        | <i>Arenibacter certessi</i> . CCUG48006T. |

Putative identity of nearest database match and accession number: *ih*, sequence insufficient homology to enable identification;

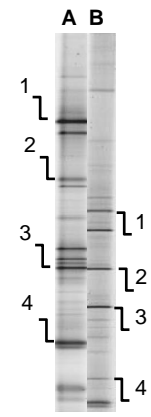

**Supplementary Figure S2. Wound microbiome dysbiosis in *Nod2*-deficient mice.** (a-c) Quantification of 16S FISH confirmed a significant increase in total eubacterial abundance in *Nod2*<sup>-/-</sup> day 3 wounds. (d-e) 16S rDNA sequencing of differentially expressed bands from the DGGE fingerprints revealed the bacterial species in wounded WT and *Nod2*<sup>-/-</sup> mice. All data are representative of two independent experiments, with *n* = 5 mice/group. \* *P* < 0.05. Mean + standard error of the mean. FISH, fluorescence in situ hybridization; sp., species; WT, wild type.

**a**

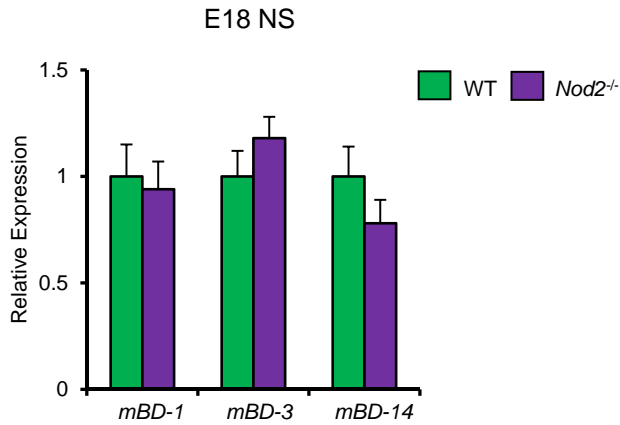

**Supplementary Figure S3. Absence of altered antimicrobial peptide production in *Nod2*-deficient mice obtained via caesarean birth.** (a) There was no significant difference in cutaneous *mBD-1*, *-3* or *-14* in *Nod2*<sup>-/-</sup> mouse skin versus WT from mice born via caesarean section. All data are representative of two independent experiments with  $n = 8-10$  mice/group. Mean + standard error of the mean. E, embryonic day; WT, wild type.

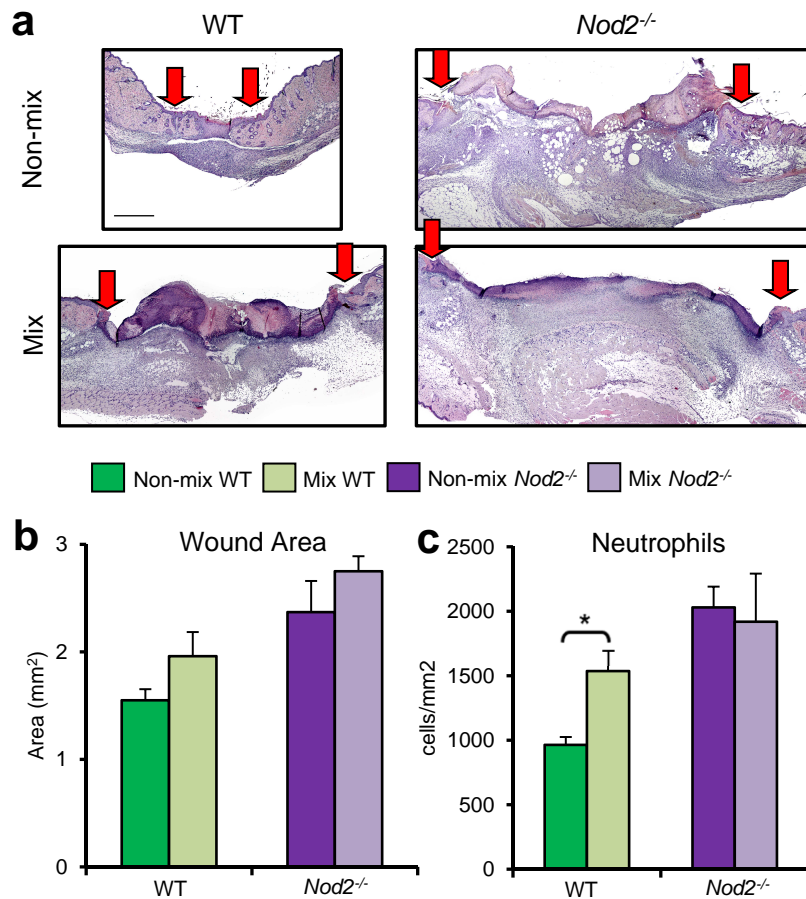

**Supplementary Figure S4. Co-housing from birth with a WT mother shows the skin microbiome directly influences healing outcome.** Newborn WT and *Nod2<sup>-/-</sup>* litters were mixed from birth with a WT mother, and then wounded in adulthood. (a) Representative H+E stained sections of excisional wounds (day 5) from WT and *Nod2<sup>-/-</sup>* control (non-mix), and co-housed (mix) cages (arrows denote wound margins). (b) Quantification showed significantly delayed healing in *Nod2<sup>-/-</sup>* mice co-housed with WT mice, with (c) increased local neutrophil influx. All data are representative of two independent experiments with  $n = 6$  mice/non-mix groups and  $n = 5$  mice/mix group. \*  $P < 0.05$ . Mean + stand error of the mean. Scale bar = 250  $\mu$ M (a). WT, wild type.

**Supplementary Table S1. Average proportion of genera for all mapped reads from the 16S Illumina high-throughput sequencing data, including probability values as determined by one-way ANOVA.**

|                                                                                                                   | WT       | Nod2 <sup>-/-</sup> | Mix      | P value |
|-------------------------------------------------------------------------------------------------------------------|----------|---------------------|----------|---------|
| k_Bacteria.p_Bacteroidetes.c_Flavobacteria.o_Flavobacteriales.f_Weeksellaceae.g                                   | 0.00314  | 0                   | 0.00018  | 0.00019 |
| k_Bacteria.p_GN02.c_BD1.5.o_f_g                                                                                   | 0.00011  | 0.00162             | 0        | 0.00354 |
| k_Bacteria.p_Actinobacteria.c_Actinobacteria.o_Actinomycetales.f_Micrococcaceae.g_Micrococcus                     | 4.8E-05  | 0.00058             | 0.00176  | 0.00457 |
| k_Bacteria.p_Bacteroidetes.c_Flavobacteria.o_Flavobacteriales.f_Flavobacteriaceae.g                               | 0.00205  | 0.00673             | 0.00203  | 0.00998 |
| k_Bacteria.p_Proteobacteria.c_Gammaproteobacteria.o_Legionellales.f_Coxiellaceae.g_Rickettsiella                  | 0        | 0.00098             | 0        | 0.01268 |
| k_Bacteria.p_OD1.c_ZB2.o_f_g                                                                                      | 0.00041  | 0.00294             | 0.00026  | 0.01494 |
| k_Bacteria.p_Firmicutes.c_Clostridia.o_Clostridiales.f_Lachnospiraceae.g_Coproccoccus                             | 0        | 0                   | 0.00032  | 0.01507 |
| k_Bacteria.p_Proteobacteria.c_Epsilonproteobacteria.o_Campylobacteriales.f_Campylobacteraceae.g_Campylobacter     | 0.00143  | 0                   | 0        | 0.01603 |
| k_Bacteria.p_Actinobacteria.c_Actinobacteria.o_Actinomycetales.f_Brevibacteriaceae.g_Brevibacterium               | 0.0082   | 0.00633             | 0.0035   | 0.0169  |
| k_Bacteria.p_TM7.c_SC3.o_f_g                                                                                      | 0        | 0.0006              | 0        | 0.01718 |
| k_Bacteria.p_Proteobacteria.c_Gammaproteobacteria.o_Pasteurellales.f_Pasteurellaceae.g_Actinobacillus             | 0.00559  | 0                   | 0.00018  | 0.01868 |
| k_Bacteria.p_Proteobacteria.c_Gammaproteobacteria.o_Enterobacteriales.f_Enterobacteriaceae.g                      | 0.116    | 0.12887             | 0.09599  | 0.02616 |
| k_Bacteria.p_Proteobacteria.c_Alphaproteobacteria.o_Sphingomonadales.f_Sphingomonadaceae.g_Sphingomonas           | 0.00049  | 0.0006              | 0.00259  | 0.02692 |
| k_Bacteria.p_Proteobacteria.c_Gammaproteobacteria.o_Pasteurellales.f_Pasteurellaceae.g_Aggregatibacter            | 0.00057  | 0.0017              | 0.01141  | 0.02792 |
| k_Bacteria.p_Firmicutes.c_Bacilli.o_Lactobacillales.f_Leuconostocaceae.g                                          | 0.00275  | 0.00105             | 0.00049  | 0.02851 |
| k_Bacteria.p_Proteobacteria.c_Epsilonproteobacteria.o_Campylobacteriales.f_Campylobacteraceae.g_Arcobacter        | 0        | 0.00077             | 0        | 0.03126 |
| k_Bacteria.p_Actinobacteria.c_Actinobacteria.o_Actinomycetales.f_Corynebacteriaceae.g_Corynebacterium             | 0.08297  | 0.07383             | 0.04718  | 0.0387  |
| k_Bacteria.p_Proteobacteria.c_Epsilonproteobacteria.o_Campylobacteriales.f_Helicobacteraceae.g_Helicobacter       | 9.57E-06 | 0                   | 4E-05    | 0.04988 |
| k_Bacteria.p_Proteobacteria.c_Betaproteobacteria.o_Burkholderiales.f_Oxalobacteraceae.g                           | 9.6E-05  | 0                   | 0.00151  | 0.05335 |
| k_Bacteria.p_Actinobacteria.c_Epsilonproteobacteria.o_Campylobacteriales.f_Campylobacteriaceae.g_Sulfurospirillum | 0        | 0                   | 0.00084  | 0.05345 |
| k_Bacteria.p_Firmicutes.c_Clostridia.o_Clostridiales.f_Ruminococcaceae.g                                          | 0        | 0.0016              | 0.0033   | 0.05784 |
| k_Bacteria.p_Firmicutes.c_Bacilli.o_Bacillales.f_Planococcaceae.g_Paenisporsosarcina                              | 0        | 0                   | 0.00029  | 0.05944 |
| k_Bacteria.p_Firmicutes.c_Bacilli.o_Bacillales.f_Exiguobacteraceae.g_Exiguobacterium                              | 0.00013  | 4.8E-05             | 0.00356  | 0.06115 |
| k_Bacteria.p_Proteobacteria.c_Epsilonproteobacteria.o_Campylobacteriales.f_Helicobacteraceae.Other                | 0.00022  | 0.00087             | 0.0029   | 0.063   |
| k_Bacteria.p_Firmicutes.c_Clostridia.o_Clostridiales.f_Veillonellaceae.g                                          | 9.6E-05  | 0                   | 0.00108  | 0.07044 |
| k_Bacteria.p_Proteobacteria.c_Alphaproteobacteria.o_Rhizobiales.f_Phyllobacteriaceae.Other                        | 0.00948  | 0.00769             | 0.00511  | 0.08109 |
| k_Bacteria.p_Proteobacteria.c_Deltaproteobacteria.o_Bdellovibrionales.f_Bacteriovoraceae.g                        | 0        | 0.00023             | 0        | 0.08894 |
| k_Bacteria.p_Proteobacteria.c_Betaproteobacteria.o_Burkholderiales.f_Burkholderiaceae.g_Burkholderia              | 5.74E-05 | 0.00116             | 0.00033  | 0.09309 |
| k_Bacteria.p_Firmicutes.c_Bacilli.o_Lactobacillales.f_Leuconostocaceae.g_Leuconostoc                              | 0        | 0.0006              | 0.00221  | 0.10767 |
| k_Bacteria.p_Actinobacteria.c_Coriobacteriales.f_Coriobacteriaceae.g_Atopobium                                    | 0.00337  | 0.00104             | 0.00204  | 0.10879 |
| k_Bacteria.p_Firmicutes.c_Bacilli.o_Lactobacillales.f_Streptococcaceae.g_Lactococcus                              | 0        | 0                   | 0.0005   | 0.11566 |
| k_Bacteria.p_Bacteroidetes.c_Bacteroidia.o_Bacteroidales.f_Porphyrinomonadaceae.g_Parabacteroides                 | 0        | 3.8E-05             | 0.00076  | 0.11989 |
| Unassigned.Other.Other.Other.Other                                                                                | 0.0148   | 0.01508             | 0.00966  | 0.12002 |
| k_Bacteria.p_Actinobacteria.c_Actinobacteria.o_Actinomycetales.f_Micrococcaceae.Other                             | 0.00057  | 0.00282             | 0.00121  | 0.12411 |
| k_Bacteria.p_Firmicutes.c_Bacilli.o_Lactobacillales.f_Streptococcaceae.g_Streptococcus                            | 0.08336  | 0.0631              | 0.04731  | 0.13493 |
| k_Bacteria.p_Firmicutes.c_Bacilli.o_Lactobacillales.f_Enterococcaceae.g_Enterococcus                              | 0.06768  | 0.05184             | 0.04181  | 0.15836 |
| k_Bacteria.p_Proteobacteria.c_Epsilonproteobacteria.o_Campylobacteriales.f_Helicobacteraceae.g                    | 0        | 0.00113             | 6.89E-05 | 0.17481 |
| k_Bacteria.p_Firmicutes.c_Clostridia.o_Clostridiales.f_Veillonellaceae.g_vadinHB04                                | 0        | 0                   | 0.0003   | 0.17855 |
| k_Bacteria.p_Firmicutes.c_Bacilli.o_Bacillales.f_Planococcaceae.g_Lysinibacillus                                  | 0        | 0.00055             | 0        | 0.17906 |
| k_Bacteria.p_Proteobacteria.c_Gammaproteobacteria.o_Enterobacteriales.f_Enterobacteriaceae.g_Proteus              | 0.00122  | 0.00269             | 0.00085  | 0.18763 |
| k_Bacteria.p_Firmicutes.c_Bacilli.o_Bacillales.f_Staphylococcaceae.g_Staphylococcus                               | 0.30266  | 0.32254             | 0.24689  | 0.18925 |
| k_Bacteria.p_Firmicutes.c_Clostridia.o_Clostridiales.f_Dehalobacteriaceae.g_Dehalobacterium                       | 0        | 0.00019             | 0        | 0.19852 |
| k_Bacteria.p_Proteobacteria.c_Gammaproteobacteria.o_Pseudomonadales.f_Pseudomonadaceae.g                          | 2.9E-05  | 0.00057             | 0.00557  | 0.19956 |
| k_Bacteria.p_Firmicutes.c_Bacilli.o_Bacillales.f_Planococcaceae.Other                                             | 0        | 0.00011             | 0.00015  | 0.19993 |
| k_Bacteria.p_Firmicutes.c_Bacilli.o_Lactobacillales.Other.Other                                                   | 0.00171  | 0.00284             | 0.0011   | 0.2107  |
| k_Bacteria.p_Verrucomicrobia.c_Verrucomicrobiae.o_Verrucomicrobiales.f_Verrucomicrobiaceae.g_Akkermansia          | 0        | 0.00088             | 0.00014  | 0.21867 |
| k_Bacteria.p_Proteobacteria.c_Gammaproteobacteria.o_Enterobacteriales.f_Enterobacteriaceae.g_Citrobacter          | 0        | 0.00104             | 0.00281  | 0.22641 |
| k_Bacteria.p_Firmicutes.c_Bacilli.o_Lactobacillales.f_Carnobacteriaceae.Other                                     | 9.57E-06 | 0                   | 2.9E-05  | 0.23156 |
| k_Bacteria.p_Actinobacteria.c_Actinobacteria.o_Actinomycetales.f_Mycobacteriaceae.g_Mycobacterium                 | 0        | 0                   | 0.00049  | 0.23489 |
| k_Bacteria.p_Fusobacteria.c_Fusobacteriales.f_Leptotrichiaceae.g                                                  | 0.00093  | 0                   | 0        | 0.24174 |
| k_Bacteria.p_Proteobacteria.c_Betaproteobacteria.o_Burkholderiales.f_Oxalobacteraceae.Other                       | 0        | 0                   | 0.00165  | 0.24274 |
| k_Bacteria.p_Proteobacteria.c_Betaproteobacteria.o_Burkholderiales.f_Comamonadaceae.g_Tepidimonas                 | 0        | 0                   | 0.00025  | 0.25053 |
| k_Bacteria.p_Proteobacteria.c_Gammaproteobacteria.o_Pseudomonadales.f_Moraxellaceae.g_Acinetobacter               | 0.00331  | 0.00874             | 0.12338  | 0.25066 |
| k_Bacteria.p_Actinobacteria.c_Actinobacteria.o_Actinomycetales.f_g                                                | 0.02757  | 0.0244              | 0.01827  | 0.26236 |
| k_Bacteria.p_Actinobacteria.c_Actinobacteria.o_Actinomycetales.f_Dermabacteriaceae.g_Dermabacter                  | 0.00097  | 0.00123             | 0.00026  | 0.26966 |
| k_Bacteria.p_Firmicutes.c_Bacilli.o_Lactobacillales.f_Carnobacteriaceae.g_Granulicatella                          | 0.00174  | 2.9E-05             | 0.00029  | 0.27766 |
| k_Bacteria.p_Proteobacteria.c_Betaproteobacteria.o_Neisseriales.f_Neisseriaceae.g                                 | 0.00055  | 0                   | 0.00015  | 0.27905 |
| k_Bacteria.Other.Other.Other.Other.Other                                                                          | 0        | 0                   | 1.1E-05  | 0.2892  |
| k_Bacteria.p_Actinobacteria.c_Actinobacteria.o_Actinomycetales.f_Dermabacteriaceae.Other                          | 0        | 9.57E-06            | 0        | 0.2892  |
| k_Bacteria.p_Actinobacteria.c_Actinobacteria.o_Actinomycetales.f_Microbacteriaceae.Other                          | 0        | 9.57E-06            | 2.3E-05  | 0.2892  |
| k_Bacteria.p_Actinobacteria.c_Actinobacteria.o_Actinomycetales.f_Microbacteriaceae.g_Leucobacter                  | 0        | 0.00031             | 0        | 0.2892  |
| k_Bacteria.p_Actinobacteria.c_Coriobacteriales.f_Coriobacteriaceae.g                                              | 0.0002   | 0                   | 0        | 0.2892  |
| k_Bacteria.p_Armatimonadetes.c_Chthonomonadetes.o_Chthonomonadales.f_Chthonomonadaceae.g_Chthonomonas             | 0.00054  | 0                   | 0        | 0.2892  |
| k_Bacteria.p_Armatimonadetes.c_Fimbrimonadetes.o_Fimbrimonadales.f_Fimbrimonadaceae.g_Fimbrimonas                 | 0        | 0.00019             | 0        | 0.2892  |
| k_Bacteria.p_Bacteroidetes.c_Bacteroidia.o_Bacteroidales.f_Paraprevotellaceae.g_Prevotella                        | 0.00563  | 0                   | 0        | 0.2892  |
| k_Bacteria.p_Bacteroidetes.c_Flavobacteria.o_Flavobacteriales.f_Cryomorphaceae.g_Fluviicola                       | 0        | 0.00026             | 0        | 0.2892  |
| k_Bacteria.p_Bacteroidetes.c_Flavobacteria.o_Flavobacteriales.f_Weeksellaceae.g_Wautersiella                      | 0        | 9.57E-06            | 0        | 0.2892  |
| k_Bacteria.p_Bacteroidetes.c_Sphingobacteriales.f_Sphingobacteriales.f_g                                          | 6.7E-05  | 0                   | 0        | 0.2892  |
| k_Bacteria.p_Bacteroidetes.c_Saprospirales.f_Chitinophagaceae.g_Sediminibacterium                                 | 1.91E-05 | 0                   | 0        | 0.2892  |
| k_Bacteria.p_Bacteroidetes.c_Saprospirales.f_Saprospiraceae.g                                                     | 0        | 0.0002              | 0        | 0.2892  |
| k_Bacteria.p_Cyanobacteria.c_Chloroplast.o_Cryptophyta.f_g                                                        | 0        | 0.00013             | 0        | 0.2892  |
| k_Bacteria.p_Cyanobacteria.c_Chloroplast.o_Stramenopiles.f_g                                                      | 4.8E-05  | 0                   | 0        | 0.2892  |
| k_Bacteria.p_Cyanobacteria.c_Synechococcales.f_Synechococcaceae.g_Synechococcus                                   | 0        | 0.00059             | 0        | 0.2892  |
| k_Bacteria.p_Firmicutes.Other.Other.Other                                                                         | 0        | 0                   | 1.1E-05  | 0.2892  |
| k_Bacteria.p_Firmicutes.c_Bacilli.o_Bacillales.f_Bacillaceae.g_Anoxybacillus                                      | 1.91E-05 | 0                   | 0        | 0.2892  |
| k_Bacteria.p_Firmicutes.c_Bacilli.o_Bacillales.f_Bacillaceae.g_Geobacillus                                        | 0        | 0.00023             | 0        | 0.2892  |
| k_Bacteria.p_Firmicutes.c_Bacilli.o_Bacillales.f_Paenibacillaceae.g_Paenibacillus                                 | 0        | 4.8E-05             | 0        | 0.2892  |
| k_Bacteria.p_Firmicutes.c_Bacilli.o_Bacillales.f_Staphylococcaceae.g_Salinococcus                                 | 0        | 9.57E-06            | 0        | 0.2892  |
| k_Bacteria.p_Firmicutes.c_Bacilli.o_Bacillales.f_Thermoactinomyces.g_Trichococcus                                 | 1.91E-05 | 0                   | 0        | 0.2892  |
| k_Bacteria.p_Firmicutes.c_Bacilli.o_Lactobacillales.f_Carnobacteriaceae.g_Trichococcus                            | 0        | 0                   | 1.1E-05  | 0.2892  |
| k_Bacteria.p_Firmicutes.c_Bacilli.o_Lactobacillales.f_Leuconostocaceae.Other                                      | 0        | 9.57E-06            | 0        | 0.2892  |
| k_Bacteria.p_Firmicutes.c_Clostridia.o_Clostridiales.f_Lachnospiraceae.g_Oribacterium                             | 0.00041  | 0                   | 0        | 0.2892  |
| k_Bacteria.p_Firmicutes.c_Clostridia.o_Clostridiales.f_Peptococcaceae.g_Peptococcus                               | 0.00022  | 0                   | 0        | 0.2892  |
| k_Bacteria.p_Firmicutes.c_Clostridia.o_Clostridiales.f_Peptostreptococcaceae.g_Filifactor                         | 9.57E-06 | 0                   | 0        | 0.2892  |
| k_Bacteria.p_Firmicutes.c_Clostridia.o_Clostridiales.f_Peptostreptococcaceae.g_Peptostreptococcus                 | 0.00067  | 0                   | 0        | 0.2892  |
| k_Bacteria.p_Firmicutes.c_Clostridia.o_Clostridiales.f_Ruminococcaceae.g_Faecalibacterium                         | 0        | 4.8E-05             | 0        | 0.2892  |
| k_Bacteria.p_Firmicutes.c_Clostridia.o_Clostridiales.f_Veillonellaceae.Other                                      | 9.57E-06 | 0                   | 0        | 0.2892  |
| k_Bacteria.p_Firmicutes.c_Clostridia.o_Clostridiales.f_Veillonellaceae.g_Megasphaera                              | 0.00203  | 0                   | 0        | 0.2892  |

|                                                                                                                           |          |          |          |         |
|---------------------------------------------------------------------------------------------------------------------------|----------|----------|----------|---------|
| k_Bacteria_p_Firmicutes_c_Clostridia_o_Clostridiales_f_Veillonellaceae_g_Selenomonas                                      | 0.00113  | 0        | 0        | 0.2892  |
| k_Bacteria_p_Firmicutes_c_Clostridia_o_Clostridiales_f_Mogibacteriaceae_g                                                 | 0.00063  | 0        | 0        | 0.2892  |
| k_Bacteria_p_Firmicutes_c_Clostridia_o_Clostridiales_f_Tissierellaceae_g                                                  | 7.7E-05  | 0        | 0        | 0.2892  |
| k_Bacteria_p_Fusobacteria_c_Fusobacteria_o_Fusobacteriales_f_Fusobacteriaceae_g_Cetobacterium                             | 0        | 0.00011  | 0        | 0.2892  |
| k_Bacteria_p_GN02_c_3BR.5F_o_f_g                                                                                          | 0        | 9.57E-06 | 0        | 0.2892  |
| k_Bacteria_p_Planctomycetes_c_Planctomycetia_o_Gemmatales_f_Gemmataceae_g_Gemmata                                         | 0        | 0.00013  | 0        | 0.2892  |
| k_Bacteria_p_Planctomycetes_c_Planctomycetia_o_Gemmatales_f_Isosphaeraceae_g                                              | 0        | 0.0002   | 0        | 0.2892  |
| k_Bacteria_p_Proteobacteria_c_Alphaproteobacteria_o_Ellin329.f_g                                                          | 0        | 9.57E-06 | 0        | 0.2892  |
| k_Bacteria_p_Proteobacteria_c_Alphaproteobacteria_o_Rhodobacteriales_f_Rhodobacteraceae_g_Rhodobacter                     | 0        | 7.7E-05  | 0        | 0.2892  |
| k_Bacteria_p_Proteobacteria_c_Alphaproteobacteria_o_Rickettsiales_f_g                                                     | 0        | 0.00039  | 0        | 0.2892  |
| k_Bacteria_p_Proteobacteria_c_Alphaproteobacteria_o_Rickettsiales_f_Rickettsiaceae_g                                      | 0        | 0.00023  | 0        | 0.2892  |
| k_Bacteria_p_Proteobacteria_c_Alphaproteobacteria_o_Sphingomonadales_f_g                                                  | 0        | 0.00032  | 0        | 0.2892  |
| k_Bacteria_p_Proteobacteria_c_Betaproteobacteria_o_Burkholderiales_f_Alcaligenaceae_g_Sutterella                          | 0        | 0.00011  | 0        | 0.2892  |
| k_Bacteria_p_Proteobacteria_c_Betaproteobacteria_o_Burkholderiales_f_Comamonadaceae_g_Ramlibacter                         | 0        | 9.57E-06 | 0        | 0.2892  |
| k_Bacteria_p_Proteobacteria_c_Betaproteobacteria_o_Rhodocyclales_f_Rhodocyclaceae_g_Propionivibrio                        | 9.57E-06 | 0        | 0        | 0.2892  |
| k_Bacteria_p_Proteobacteria_c_Deltaproteobacteria_o_Myxococcales_f_Polyangiaceae_Other                                    | 6.7E-05  | 0        | 0        | 0.2892  |
| k_Bacteria_p_Proteobacteria_c_Gammaproteobacteria_o_Xanthomonadales_f_Xanthomonadaceae_Other                              | 2.9E-05  | 0        | 0        | 0.2892  |
| k_Bacteria_p_Synergistetes_c_Synergistia_o_Synergistales_f_Dethiosulfonitrilobacteraceae_g_TG5                            | 1.91E-05 | 0        | 0        | 0.2892  |
| k_Bacteria_p_TM7_c_o_f_g                                                                                                  | 0.00011  | 0        | 0        | 0.2892  |
| k_Bacteria_p_TM7_c_TM7.3_o_CW040.f_g                                                                                      | 0.00055  | 0        | 0        | 0.2892  |
| k_Bacteria_p_Verrucomicrobia_c_Opitutae_o_Opitutales_f_Opitutaceae_g_Opitutus                                             | 9.57E-06 | 0        | 0        | 0.2892  |
| k_Bacteria_p_Verrucomicrobia_c_Spartobacteria_o_Chthoniobacterales_f_Chthoniobacteraceae_g                                | 0        | 0.00027  | 0        | 0.2892  |
| k_Bacteria_p_Verrucomicrobia_c_Spartobacteria_o_Chthoniobacterales_f_Chthoniobacteraceae_g_Candidatus.Xiphinematobacter   | 0        | 0.00036  | 0        | 0.2892  |
| k_Bacteria_p_ZB3_c_BS119.o_f_g                                                                                            | 0        | 0.00015  | 0        | 0.2892  |
| k_Bacteria_p_Cyanobacteria_c_Chloroplast.o_Streptophyta_f_g                                                               | 0.00602  | 0.0263   | 0.03198  | 0.29009 |
| k_Bacteria_p_Actinobacteria_c_Actinobacteria_o_Actinomycetales_f_Nocardiaceae_g_Rhodococcus                               | 0        | 0        | 8.6E-05  | 0.29148 |
| k_Bacteria_p_Verrucomicrobia_c_Opitutae_o_HA64.f_g                                                                        | 0        | 0        | 0.00014  | 0.29276 |
| k_Bacteria_p_Firmicutes_c_Bacilli_o_Lactobacillales_f_g                                                                   | 0.0002   | 0.00126  | 0.00055  | 0.29354 |
| k_Bacteria_p_Proteobacteria_c_Alphaproteobacteria_o_Rhizobiales_f_g                                                       | 0        | 0.0004   | 5.7E-06  | 0.29491 |
| k_Bacteria_p_Firmicutes_c_Erysipelotrichi_o_Erysipelotrichales_f_Erysipelotrichaceae_g_Bulleidia                          | 0.00039  | 0        | 5.7E-06  | 0.29505 |
| k_Bacteria_p_Cyanobacteria_c_4C0d.2_o_YS2.f_g                                                                             | 0        | 0        | 0.00015  | 0.29551 |
| k_Bacteria_p_Proteobacteria_c_Betaproteobacteria_o_Burkholderiales_f_Comamonadaceae_g_Delftia                             | 0.00032  | 0.00019  | 4.59E-05 | 0.29572 |
| k_Bacteria_p_Actinobacteria_c_Actinobacteria_o_Actinomycetales_f_Nocardiodiaceae_g_Aeromicrobium                          | 9.6E-05  | 0.00072  | 0        | 0.29659 |
| k_Bacteria_p_Proteobacteria_c_Gammaproteobacteria_o_Leionellales_f_Leionellaceae_g                                        | 0        | 0.00045  | 4.59E-05 | 0.29857 |
| k_Bacteria_p_Actinobacteria_c_Actinobacteria_o_Actinomycetales_f_Actinomycetaceae_Other                                   | 0        | 0.00044  | 1.1E-05  | 0.29948 |
| k_Bacteria_p_Proteobacteria_c_Alphaproteobacteria_o_Rhodospirillales_f_Rhodospirillaceae_g_Azospirillum                   | 0        | 0        | 8.04E-05 | 0.29958 |
| k_Bacteria_p_Acidobacteria_c_Chloracidobacteria_o_RB41.f_Ellin6075_g                                                      | 9.57E-06 | 0.00016  | 0        | 0.30317 |
| k_Bacteria_p_Proteobacteria_c_Alphaproteobacteria_o_Sphingomonadales_f_Sphingomonadaceae_g_Sphingobium                    | 0        | 0        | 0.00063  | 0.30456 |
| k_Bacteria_p_Actinobacteria_c_Actinobacteria_o_Actinomycetales_f_Micrococcales_g_Renibacterium                            | 0.00013  | 9.57E-06 | 0        | 0.30625 |
| k_Bacteria_p_Actinobacteria_c_Rubrobacteria_o_Rubrobacteriales_f_Rubrobacteraceae_g_Rubrobacter                           | 0.00036  | 0        | 1.7E-05  | 0.30962 |
| k_Bacteria_p_Actinobacteria_c_Alphaproteobacteria_o_f_g                                                                   | 0.0004   | 3.8E-05  | 0        | 0.31211 |
| k_Bacteria_p_Actinobacteria_c_Actinobacteria_o_Actinomycetales_f_Micrococcales_g_Kocuria                                  | 9.57E-06 | 0        | 0.00053  | 0.31422 |
| k_Bacteria_p_Proteobacteria_c_Gammaproteobacteria_o_Leionellales_f_Leionellaceae_g_Legionella                             | 0        | 8.6E-05  | 5.7E-06  | 0.31915 |
| k_Bacteria_p_Firmicutes_c_Clostridia_o_Clostridiales_f_Clostridiaceae_g_Clostridium                                       | 0.00273  | 0.00136  | 0.00161  | 0.32116 |
| k_Bacteria_p_Actinobacteria_c_Actinobacteria_o_Actinomycetales_f_Dermacoccaceae_g_Dermacoccus                             | 0.00066  | 0.00019  | 0.00018  | 0.32335 |
| k_Bacteria_p_Firmicutes_c_Clostridia_o_Clostridiales_f_Veillonellaceae_g_Veillonella                                      | 0.02822  | 0.00474  | 0.00191  | 0.32897 |
| k_Bacteria_p_Proteobacteria_c_Alphaproteobacteria_o_Sphingomonadales_f_Erythrobacteraceae_g                               | 0        | 6.7E-05  | 5.7E-06  | 0.32921 |
| k_Bacteria_p_Cyanobacteria_c_ML635J.21.o_f_g                                                                              | 0.00046  | 0        | 4.02E-05 | 0.33019 |
| k_Bacteria_p_Proteobacteria_c_Betaproteobacteria_o_Burkholderiales_f_Oxalobacteraceae_g_Janthinobacterium                 | 0        | 9.57E-06 | 0.00086  | 0.33168 |
| k_Bacteria_p_Bacteroidetes_c_Bacteroidia_o_Bacteroidales_f_Prevotellaceae_g_Prevotella                                    | 0.02799  | 0.00159  | 0.00454  | 0.33181 |
| k_Bacteria_p_Firmicutes_c_Bacilli_o_Gemellales_f_Gemellaceae_g_Gemella                                                    | 0.00521  | 0.04544  | 0.00592  | 0.33343 |
| k_Bacteria_p_Firmicutes_c_Bacilli_o_Lactobacillales_f_Streptococcaceae_g                                                  | 5.74E-05 | 0.00014  | 5.7E-06  | 0.33362 |
| k_Bacteria_p_Proteobacteria_c_Betaproteobacteria_o_Burkholderiales_f_Comamonadaceae_g                                     | 0.00012  | 0.00124  | 0.00051  | 0.33768 |
| k_Bacteria_p_Proteobacteria_c_Gammaproteobacteria_o_Enterobacteriales_f_Enterobacteriaceae_g_Erwinia                      | 2.9E-05  | 1.91E-05 | 0.0007   | 0.33859 |
| k_Bacteria_p_Proteobacteria_c_Betaproteobacteria_o_Methylophilales_f_Methylophilaceae_g                                   | 1.91E-05 | 0.0002   | 1.1E-05  | 0.33964 |
| k_Bacteria_p_Bacteroidetes_c_Flavobacteria_o_Flavobacteriales_f_Flavobacteriaceae_g_Flavobacterium                        | 4.8E-05  | 0.00035  | 5.17E-05 | 0.34026 |
| k_Bacteria_p_Proteobacteria_c_Deltaproteobacteria_o_Desulfonitrilobacteriales_f_Desulfonitrilobacteraceae_g               | 0        | 0.00042  | 5.17E-05 | 0.34084 |
| k_Bacteria_p_Firmicutes_c_Bacilli_o_Lactobacillales_f_Leuconostocaceae_g_Weissella                                        | 0        | 0        | 3.44E-05 | 0.34288 |
| k_Bacteria_p_Proteobacteria_c_Gammaproteobacteria_o_Pseudomonadales_f_Moraxellaceae_g_Enhydrobacter                       | 0.002    | 0.00036  | 0.00157  | 0.34575 |
| k_Bacteria_p_Firmicutes_c_Clostridia_o_Clostridiales_f_Lachnospiraceae_g_Butyrvibrio                                      | 4.8E-05  | 0        | 5.7E-06  | 0.34886 |
| k_Bacteria_p_Proteobacteria_c_Betaproteobacteria_o_Burkholderiales_f_Oxalobacteraceae_g_Polynucleobacter                  | 0        | 9.6E-05  | 1.1E-05  | 0.34886 |
| k_Bacteria_p_Actinobacteria_c_Actinobacteria_o_Actinomycetales_f_Dietziaceae_Other                                        | 0        | 0.00037  | 5.17E-05 | 0.34919 |
| k_Bacteria_p_Deferribacteres_c_Deferribacteres_o_Deferribacterales_f_Deferribacteraceae_g_Mucispirillum                   | 0        | 0        | 0.00032  | 0.35307 |
| k_Bacteria_p_Proteobacteria_c_Alphaproteobacteria_o_Rhizobiales_f_Rhizobiaceae_g_Agrobacterium                            | 0.00058  | 0.00104  | 0.00135  | 0.35625 |
| k_Bacteria_p_Proteobacteria_c_Alphaproteobacteria_o_Rhizobiales_f_Hyphomicrobiaceae_g_Devesia                             | 0        | 8.6E-05  | 1.1E-05  | 0.35699 |
| k_Bacteria_p_Proteobacteria_c_Alphaproteobacteria_o_Rhodospirillales_f_Acetobacteraceae_g                                 | 0        | 2.9E-05  | 1.1E-05  | 0.35699 |
| k_Bacteria_p_Proteobacteria_c_Betaproteobacteria_o_Burkholderiales_f_Comamonadaceae_g_Comamonas                           | 0        | 0        | 0.00119  | 0.36243 |
| k_Bacteria_p_Actinobacteria_c_Actinobacteria_o_Actinomycetales_f_Bogoriellaceae_g_Georginia                               | 2.9E-05  | 3.83E-05 | 0.00012  | 0.36246 |
| k_Bacteria_p_Proteobacteria_c_Betaproteobacteria_o_Neisseriales_f_Neisseriaceae_g_Neisseria                               | 0.00401  | 6.7E-05  | 0.00083  | 0.3691  |
| k_Bacteria_p_TM7_c_TM7.3.o_f_g                                                                                            | 0.00139  | 0        | 0.00028  | 0.37334 |
| k_Bacteria_p_Proteobacteria_Other_Other_Other_Other                                                                       | 9.57E-06 | 6.7E-05  | 5.7E-06  | 0.37438 |
| k_Bacteria_p_Proteobacteria_c_Gammaproteobacteria_o_Enterobacteriales_f_Enterobacteriaceae_g_Serratia                     | 0.00013  | 4.8E-05  | 0        | 0.37575 |
| k_Bacteria_p_Proteobacteria_c_Deltaproteobacteria_o_Desulfonitrilobacteriales_f_Desulfonitrilobacteraceae_g_Desulfovibrio | 0        | 0        | 0.00033  | 0.37799 |
| k_Bacteria_p_Firmicutes_c_Clostridia_o_Clostridiales_f_Lachnospiraceae_g_Ruminococcus                                     | 4.8E-05  | 0.00065  | 0.0001   | 0.38082 |
| k_Bacteria_p_Proteobacteria_c_Gammaproteobacteria_o_Pasteurellales_f_Pasteurellaceae_Other                                | 3.8E-05  | 0        | 6.89E-05 | 0.38149 |
| k_Bacteria_p_Actinobacteria_c_Actinobacteria_o_Actinomycetales_f_Actinomycetaceae_g_Actinomycetes                         | 0.00389  | 0.00209  | 0.00069  | 0.38492 |
| k_Bacteria_p_Proteobacteria_c_Alphaproteobacteria_o_Caulobacteriales_f_Caulobacteraceae_g                                 | 0.00042  | 0.00034  | 0.00087  | 0.38534 |
| k_Bacteria_p_Firmicutes_c_Bacilli_o_Gemellales_f_Gemellaceae_g                                                            | 0.0017   | 0.00286  | 0.00362  | 0.38795 |
| k_Bacteria_p_Bacteroidetes_c_Bacteroidia_o_Bacteroidales_f_Rikenellaceae_g                                                | 0        | 9.57E-06 | 0.00046  | 0.3914  |
| k_Bacteria_p_Firmicutes_c_Bacilli_o_Gemellales_f_g                                                                        | 9.57E-06 | 0.00034  | 0.00057  | 0.40063 |
| k_Bacteria_p_Proteobacteria_c_Gammaproteobacteria_o_Leionellales_f_g                                                      | 0        | 5.7E-05  | 1.1E-05  | 0.40095 |
| k_Bacteria_p_Proteobacteria_c_Gammaproteobacteria_Other_Other_Other                                                       | 0        | 0        | 2.3E-05  | 0.40095 |
| k_Bacteria_p_Proteobacteria_c_Gammaproteobacteria_o_Pasteurellales_f_Pasteurellaceae_g                                    | 2.9E-05  | 0        | 5.7E-06  | 0.40095 |
| k_Bacteria_p_Actinobacteria_c_Betaproteobacteria_o_Methylophilales_f_Methylophilaceae_g_Methylotenera                     | 0        | 0        | 6.89E-05 | 0.40096 |
| k_Bacteria_p_Bacteroidetes_c_Sphingobacteria_o_Sphingobacteriales_f_Sphingobacteriaceae_g                                 | 9.57E-06 | 1.91E-05 | 0        | 0.4037  |
| k_Bacteria_p_Planctomycetes_c_Phycisphaerae_o_Phycisphaerales_f_g                                                         | 1.91E-05 | 9.57E-06 | 0        | 0.4037  |
| k_Bacteria_p_Bacteroidetes_c_Bacteroidia_o_Bacteroidales_f_Porphyrmonadaceae_g                                            | 0        | 0        | 0.00151  | 0.40662 |
| k_Bacteria_p_Firmicutes_c_Clostridia_o_Clostridiales_f_Tissierellaceae_g_Helcococcus                                      | 0.013    | 0.01404  | 0.00876  | 0.41212 |
| k_Bacteria_p_Proteobacteria_c_Betaproteobacteria_o_Burkholderiales_f_Oxalobacteraceae_g_Ralstonia                         | 8.6E-05  | 6.7E-05  | 0.00033  | 0.41857 |
| k_Bacteria_p_Proteobacteria_c_Alphaproteobacteria_o_Rhizobiales_f_Phylobacteriaceae_g                                     | 0.00218  | 0.00164  | 0.00137  | 0.41942 |
| k_Bacteria_p_Fusobacteria_c_Fusobacteria_o_Fusobacteriales_f_Leptotrichiaceae_g_Leptotrichia                              | 0.00098  | 0        | 0.00022  | 0.42161 |
| k_Bacteria_p_Actinobacteria_c_Actinobacteria_o_Bifidobacteriales_f_Bifidobacteriaceae_g_Bifidobacterium                   | 7.7E-05  | 0.00011  | 0        | 0.42604 |

|                                                                                                              |          |          |          |         |
|--------------------------------------------------------------------------------------------------------------|----------|----------|----------|---------|
| k_Bacteria_p_Bacteroidetes.c_Bacteroidia.o_Bacteroidales.f_Odoribacteraceae.g_Odoribacter                    | 4.8E-05  | 0        | 1.1E-05  | 0.42915 |
| k_Bacteria_p_Bacteroidetes.c_Bacteroidia.o_Bacteroidales.f_S24.7.g                                           | 0.00111  | 0.00075  | 0.00201  | 0.42928 |
| k_Bacteria_p_Firmicutes.c_Bacilli.o_Gemellales.Other.Other                                                   | 9.57E-06 | 4.78E-05 | 2.9E-05  | 0.42946 |
| k_Bacteria_p_Proteobacteria.c_Gammaproteobacteria.o_Enterobacteriales.f_Enterobacteriaceae.Other             | 0.0005   | 0.00139  | 0.00109  | 0.43014 |
| k_Bacteria_p_Bacteroidetes.c_Bacteroidia.o_Bacteroidales.f_Porphyromonadaceae.g_Porphyromonas                | 0.00036  | 0.00011  | 3.44E-05 | 0.43517 |
| k_Bacteria_p_Proteobacteria.c_Deltaproteobacteria.o_Bdellovibrionales.f_Bdellovibrionaceae.g_Bdellovibrio    | 0        | 0.00011  | 2.9E-05  | 0.43632 |
| k_Bacteria_p_Firmicutes.c_Clostridia.o_Clostridiales.f_Tissierellaceae.g_Parvimonas                          | 0.00021  | 0.00025  | 0        | 0.4381  |
| k_Bacteria_p_Firmicutes.c_Erysipelotrichi.o_Erysipelotrichales.f_Erysipelotrichaceae.g                       | 0        | 0        | 0.00014  | 0.44079 |
| k_Bacteria_p_Actinobacteria.c_Coriobacteriales.f_Coriobacteriaceae.g_Adlercreutzia                           | 0.00019  | 0        | 0.00023  | 0.44314 |
| k_Bacteria_p_Firmicutes.c_Bacilli.o_Lactobacillales.f_Enterococcaceae.g                                      | 0.00022  | 0.00012  | 5.2E-05  | 0.44435 |
| k_Bacteria_p_Proteobacteria.c_Alphaproteobacteria.o_Rickettsiales.f_mitochondria.Other                       | 0.00448  | 0.01322  | 0.01467  | 0.4464  |
| k_Bacteria_p_Bacteroidetes.c_Flavobacteriales.f_Flavobacteriales.f_Weeksellaceae.g_Cloacibacterium           | 0        | 9.57E-06 | 0.00019  | 0.4476  |
| k_Bacteria_p_Proteobacteria.c_Alphaproteobacteria.o_Rhizobiales.f_Phyllobacteriaceae.g_Aminobacter           | 0        | 1.91E-05 | 1.7E-05  | 0.44761 |
| k_Bacteria_p_TM6.c_SJA.4.o_f.g                                                                               | 0        | 0        | 0.00026  | 0.45312 |
| k_Bacteria_p_Proteobacteria.c_Betaproteobacteria.o_Rhodocyclales.f_Rhodocyclaceae.Other                      | 0.00011  | 9.57E-06 | 2.30E-05 | 0.45322 |
| k_Bacteria_p_Actinobacteria.c_Actinobacteria.o_Actinomycetales.f_Actinomycetaceae.g_Arcanobacterium          | 0.02861  | 0.03215  | 0.02287  | 0.45508 |
| k_Bacteria_p_Proteobacteria.c_Gammaproteobacteria.o_Pasteurellales.f_Pasteurellaceae.g_Haemophilus           | 0.00281  | 0.00037  | 0.00105  | 0.45696 |
| k_Bacteria_p_Proteobacteria.c_Gammaproteobacteria.o_Enterobacteriales.f_Enterobacteriaceae.g_Trabulsilla     | 2.9E-05  | 7.65E-05 | 4.02E-05 | 0.46045 |
| k_Bacteria_p_Proteobacteria.c_Sphingobacteria.o_Sphingobacteriales.f_Sphingobacteriaceae.g_Pedobacter        | 0        | 0        | 0.00045  | 0.46203 |
| k_Bacteria_p_Proteobacteria.c_Alphaproteobacteria.o_Rhizobiales.f_Brucellaceae.g_Ochrobactrum                | 0.00034  | 0.00066  | 0.00028  | 0.46422 |
| k_Bacteria_p_Proteobacteria.c_Betaproteobacteria.o_Burkholderiales.f_Comamonadaceae.Other                    | 0        | 0        | 3.4E-05  | 0.46822 |
| k_Bacteria_p_Firmicutes.c_Bacilli.o_Bacillales.f_Bacillaceae.g_Anaerobacillus                                | 0        | 1.91E-05 | 5.7E-06  | 0.47227 |
| k_Bacteria_p_Proteobacteria.c_Gammaproteobacteria.o_Enterobacteriales.f_Enterobacteriaceae.g_Enterobacter    | 1.91E-05 | 0        | 5.7E-06  | 0.47227 |
| k_Bacteria_p_Actinobacteria.c_Actinobacteria.o_Actinomycetales.f_Micrococcaceae.g                            | 0.00608  | 0.00809  | 0.00925  | 0.48016 |
| k_Bacteria_p_Firmicutes.c_Bacilli.o_Bacillales.f_Bacillaceae.g                                               | 0.00011  | 0.00077  | 0.00047  | 0.49121 |
| k_Bacteria_p_Firmicutes.c_Bacilli.o_Lactobacillales.f_Aerococcaceae.Other                                    | 0        | 0        | 0.0004   | 0.49964 |
| k_Bacteria_p_Firmicutes.c_Bacilli.o_Bacillales.f_Planococcaceae.g_Sporosarcina                               | 0.00044  | 0        | 0.00015  | 0.49997 |
| k_Bacteria_p_Proteobacteria.c_Alphaproteobacteria.o_Rhizobiales.f_Methylobacteriaceae.g                      | 0        | 0        | 0.00045  | 0.50127 |
| k_Bacteria_p_Fusobacteria.c_Fusobacteriales.f_Fusobacteriaceae.g_Fusobacterium                               | 0.00126  | 0        | 0.00051  | 0.50685 |
| k_Bacteria_p_Firmicutes.c_Clostridia.o_Clostridiales.f_g                                                     | 0.00264  | 0.00634  | 0.0068   | 0.52194 |
| k_Bacteria_p_Proteobacteria.c_Gammaproteobacteria.o_Alteromonadales.f_Shewanellaceae.g_Shewanella            | 0.00044  | 4.8E-05  | 0.0002   | 0.52602 |
| k_Bacteria_p_Actinobacteria.c_Actinobacteria.o_Actinomycetales.f_Microbacteriaceae.g_Pseudoclavibacter       | 0.00267  | 0.00136  | 0.00242  | 0.53026 |
| k_Bacteria_p_Actinobacteria.c_Actinobacteria.o_Actinomycetales.f_Micrococcaceae.g_Rothia                     | 0.00276  | 0.00056  | 0.00121  | 0.54166 |
| k_Bacteria_p_Firmicutes.c_Bacilli.o_Bacillales.f_Bacillaceae.g_Bacillus                                      | 0.00057  | 6.70E-05 | 0.00039  | 0.54293 |
| k_Bacteria_p_Bacteroidetes.c_Saprosirales.o_Saprosirales.f_Chitinophagaceae.g_Flavisolobacter                | 3.8E-05  | 0        | 0.00042  | 0.54371 |
| k_Bacteria_p_Spirochaetes.c_Spirochaetes.o_Spirochaetales.f_Spirochaetaceae.g_Treponema                      | 0.00059  | 0        | 0.00024  | 0.54514 |
| k_Bacteria_p_Proteobacteria.c_Alphaproteobacteria.o_Rhodospirillales.f_Acetobacteraceae.g_Acetobacter        | 0.00144  | 0.00123  | 0.0007   | 0.55039 |
| k_Bacteria_p_Firmicutes.c_Clostridia.o_Clostridiales.f_Moglibacteriaceae.g_Anaerovorax                       | 0        | 0        | 0.00026  | 0.55061 |
| k_Bacteria_p_Firmicutes.c_Clostridia.o_Clostridiales.f_Veillonellaceae.g_Dialister                           | 0        | 0.00045  | 0.00019  | 0.55449 |
| k_Bacteria_p_Proteobacteria.c_Alphaproteobacteria.o_Rhizobiales.f_Rhizobiaceae.Other                         | 0        | 0        | 0.00011  | 0.56243 |
| k_Bacteria_p_Firmicutes.c_Bacilli.o_Lactobacillales.f_Aerococcaceae.g_Facklamia                              | 0.0029   | 0.00413  | 0.0017   | 0.56891 |
| k_Bacteria_p_Firmicutes.c_Clostridia.o_Clostridiales.f_Ruminococcaceae.g_Oscillospira                        | 0.0002   | 0.00112  | 0.00145  | 0.57637 |
| k_Bacteria_p_Actinobacteria.c_Actinobacteria.o_Actinomycetales.f_Micrococcaceae.g_Arthrobacter               | 9.57E-06 | 0.00011  | 0.00042  | 0.57831 |
| k_Bacteria_p_Firmicutes.c_Bacilli.o_Bacillales.f_Staphylococcaceae.Other                                     | 2.9E-05  | 9.57E-06 | 1.1E-05  | 0.57838 |
| k_Bacteria_p_Firmicutes.c_Clostridia.o_Clostridiales.f_Peptostreptococcaceae.g                               | 0        | 0        | 0.00025  | 0.58267 |
| k_Bacteria_p_Proteobacteria.c_Gammaproteobacteria.o_Pseudomonadales.f_Pseudomonadaceae.g_Pseudomonas         | 0.01004  | 0.00351  | 0.00491  | 0.58696 |
| k_Bacteria_p_Proteobacteria.c_Gammaproteobacteria.o_Pseudomonadales.f_Moraxellaceae.g_Psychrobacter          | 0        | 9.57E-06 | 0.00021  | 0.59287 |
| k_Bacteria_p_Firmicutes.c_Bacilli.o_Lactobacillales.f_Aerococcaceae.g_Aerococcus                             | 0.00027  | 0        | 0.00013  | 0.59592 |
| k_Bacteria_p_Acidobacteria.c_Acidobacteria.6.o_iii1.15.f.g                                                   | 0        | 0        | 0.00013  | 0.5997  |
| k_Bacteria_p_Actinobacteria.c_Actinobacteria.o_Actinomycetales.f_Dermabacteraceae.g_Brachybacterium          | 0        | 0        | 0.0002   | 0.5997  |
| k_Bacteria_p_Actinobacteria.c_Actinobacteria.o_Actinomycetales.f_Intrasporangiaceae.g_Janibacter             | 0        | 0        | 0.00018  | 0.5997  |
| k_Bacteria_p_Actinobacteria.c_Actinobacteria.o_Actinomycetales.f_Microbacteriaceae.g                         | 0        | 0        | 5.17E-05 | 0.5997  |
| k_Bacteria_p_Actinobacteria.c_Actinobacteria.o_Actinomycetales.f_Micrococcaceae.g_Nesteronkia                | 0        | 0        | 5.7E-06  | 0.5997  |
| k_Bacteria_p_Actinobacteria.c_Actinobacteria.o_Actinomycetales.f_Nocardioideae.g_Nocardioides                | 0        | 0        | 3.44E-05 | 0.5997  |
| k_Bacteria_p_Actinobacteria.c_Thermoleophilina.o_Solirubrobacterales.Other.Other                             | 0        | 0        | 4.59E-05 | 0.5997  |
| k_Bacteria_p_Armatimonadetes.c_Armatimonadia.o_Armatimonadales.f_Armatimonadaceae.g                          | 0        | 0        | 0.00013  | 0.5997  |
| k_Bacteria_p_Bacteroidetes.c_Bacteroidia.o_Bacteroidales.f_Rikenellaceae.g_AF12                              | 0        | 0        | 0.00021  | 0.5997  |
| k_Bacteria_p_Bacteroidetes.c_Cytophagia.o_Cytophagales.f_Cytophagaceae.g                                     | 0        | 0        | 5.17E-05 | 0.5997  |
| k_Bacteria_p_Bacteroidetes.c_Cytophagia.o_Cytophagales.f_Cytophagaceae.g_Hymenobacter                        | 0        | 0        | 5.7E-05  | 0.5997  |
| k_Bacteria_p_Bacteroidetes.c_Rhodothermiales.o_Rhodothermiales.f_Balneolaceae.g_KSA1                         | 0        | 0        | 0.00018  | 0.5997  |
| k_Bacteria_p_Chlamydiae.c_Chlamydia.o_Chlamydiales.f_g                                                       | 0        | 0        | 5.7E-05  | 0.5997  |
| k_Bacteria_p_Chlamydiae.c_Chlamydia.o_Chlamydiales.f_Parachlamydiaceae.Other                                 | 0        | 0        | 5.7E-06  | 0.5997  |
| k_Bacteria_p_Cyanobacteria.c_Oscillatoriothycideae.o_Chroococcales.f_Xenococcaceae.g                         | 0        | 0        | 6.89E-05 | 0.5997  |
| k_Bacteria_p_Firmicutes.c_Bacilli.o_Bacillales.f_Planococcaceae.g_Planomicrobium                             | 0        | 0        | 5.7E-06  | 0.5997  |
| k_Bacteria_p_Firmicutes.c_Bacilli.o_Bacillales.f_Exiguobacteraceae.g                                         | 0        | 0        | 1.1E-05  | 0.5997  |
| k_Bacteria_p_Firmicutes.c_Bacilli.o_Lactobacillales.f_Carnobacteriaceae.g                                    | 0        | 0        | 0.00013  | 0.5997  |
| k_Bacteria_p_Firmicutes.c_Bacilli.o_Lactobacillales.f_Enterococcaceae.g_Melissococcus                        | 0        | 0        | 1.1E-05  | 0.5997  |
| k_Bacteria_p_Firmicutes.c_Bacilli.o_Lactobacillales.f_Lactobacillaceae.g                                     | 0        | 0        | 0.00025  | 0.5997  |
| k_Bacteria_p_Firmicutes.c_Bacilli.o_Lactobacillales.f_Streptococcaceae.Other                                 | 0        | 0        | 5.7E-06  | 0.5997  |
| k_Bacteria_p_Firmicutes.c_Clostridia.o_Clostridiales.f_Christensenellaceae.g                                 | 0        | 0        | 1.1E-05  | 0.5997  |
| k_Bacteria_p_Firmicutes.c_Clostridia.o_Clostridiales.f_Clostridiaceae.g                                      | 0        | 0        | 1.7E-05  | 0.5997  |
| k_Bacteria_p_Firmicutes.c_Clostridia.o_Clostridiales.f_Eubacteriaceae.g_Acetobacterium                       | 0        | 0        | 1.1E-05  | 0.5997  |
| k_Bacteria_p_Firmicutes.c_Clostridia.o_Clostridiales.f_Lachnospiraceae.Other                                 | 0        | 0        | 1.7E-05  | 0.5997  |
| k_Bacteria_p_Firmicutes.c_Clostridia.o_Clostridiales.f_Peptococcaceae.g                                      | 0        | 0        | 1.1E-05  | 0.5997  |
| k_Bacteria_p_Firmicutes.c_Clostridia.o_Clostridiales.f_Veillonellaceae.g_Anaeromusa                          | 0        | 0        | 0.0004   | 0.5997  |
| k_Bacteria_p_Gemmatimonadetes.c_Gemmatimonadetes.o_f.g                                                       | 0        | 0        | 5.17E-05 | 0.5997  |
| k_Bacteria_p_OD1.c_o_f.g                                                                                     | 0        | 0        | 7.46E-05 | 0.5997  |
| k_Bacteria_p_OD1.c_SM2F11.o_f.g                                                                              | 0        | 0        | 8.6E-05  | 0.5997  |
| k_Bacteria_p_Planctomycetes.c_Planctomycetia.o_Pirellulales.f_Pirellulaceae.g                                | 0        | 0        | 2.9E-05  | 0.5997  |
| k_Bacteria_p_Proteobacteria.c_Alphaproteobacteria.o_Caulobacteriales.f_Caulobacteraceae.g_Brevundimonas      | 0        | 0        | 0.0001   | 0.5997  |
| k_Bacteria_p_Proteobacteria.c_Alphaproteobacteria.o_Rhodobacterales.f_Rhodobacteraceae.g                     | 0        | 0        | 0.00017  | 0.5997  |
| k_Bacteria_p_Proteobacteria.c_Alphaproteobacteria.o_Rhodospirillales.f_Acetobacteraceae.g_Gluconobacter      | 0        | 0        | 0.0002   | 0.5997  |
| k_Bacteria_p_Proteobacteria.c_Alphaproteobacteria.o_Rhodospirillales.f_Rhodospirillaceae.g                   | 0        | 0        | 0.00025  | 0.5997  |
| k_Bacteria_p_Proteobacteria.c_Alphaproteobacteria.o_Sphingomonadales.f_Sphingomonadaceae.g_Sphingopyxis      | 0        | 0        | 5.7E-06  | 0.5997  |
| k_Bacteria_p_Proteobacteria.c_Betaproteobacteria.Other.Other.Other                                           | 0        | 0        | 1.1E-05  | 0.5997  |
| k_Bacteria_p_Proteobacteria.c_Betaproteobacteria.o_Burkholderiales.f_Comamonadaceae.g_Curvibacter            | 0        | 0        | 8.6E-05  | 0.5997  |
| k_Bacteria_p_Proteobacteria.c_Betaproteobacteria.o_Burkholderiales.f_Oxalobacteraceae.g_Cupriavidus          | 0        | 0        | 1.1E-05  | 0.5997  |
| k_Bacteria_p_Proteobacteria.c_Deltaproteobacteria.o_MIZ46.f.g                                                | 0        | 0        | 1.7E-05  | 0.5997  |
| k_Bacteria_p_Proteobacteria.c_Gammaproteobacteria.o_Cardiobacteriales.f_Cardiobacteriaceae.g_Cardiobacterium | 0        | 0        | 0.00015  | 0.5997  |
| k_Bacteria_p_Proteobacteria.c_Gammaproteobacteria.o_Chromatiales.f_g                                         | 0        | 0        | 0.00021  | 0.5997  |
| k_Bacteria_p_Proteobacteria.c_Gammaproteobacteria.o_Pseudomonadales.Other.Other                              | 0        | 0        | 1.1E-05  | 0.5997  |
| k_Bacteria_p_Proteobacteria.c_Gammaproteobacteria.o_Pseudomonadales.f_Moraxellaceae.g                        | 0        | 0        | 1.1E-05  | 0.5997  |

|                                                                                                           |          |          |          |         |
|-----------------------------------------------------------------------------------------------------------|----------|----------|----------|---------|
| k_Bacteria_p_Proteobacteria.c_Gammaproteobacteria.o_Pseudomonadales.f_Pseudomonadaceae.Other              | 0        | 0        | 5.7E-06  | 0.5997  |
| k_Bacteria_p_Proteobacteria.c_Gammaproteobacteria.o_Xanthomonadales.f_Xanthomonadaceae.g_Luteibacter      | 0        | 0        | 2.30E-05 | 0.5997  |
| k_Bacteria_p_Proteobacteria.c_Gammaproteobacteria.o_Xanthomonadales.f_Xanthomonadaceae.g_Lysobacter       | 0        | 0        | 4.02E-05 | 0.5997  |
| k_Bacteria_p_TM7.c_TM7.3.o_CW040.f_F16.g                                                                  | 0        | 0        | 0.00025  | 0.5997  |
| k_Bacteria_p_Thermi.c_Deinococci.o_Deinococcales.f_Deinococcaceae.g_Deinococcus                           | 0        | 0        | 7.46E-05 | 0.5997  |
| k_Bacteria_p_Actinobacteria.c_Actinobacteria.o_Actinomycetales.f_Beutenbergiaceae.g_Salana                | 0        | 0        | 3.44E-05 | 0.5997  |
| k_Bacteria_p_Armatimonadetes.c_Armatimonadia.o_Armatimonadales.f_Armatimonadaceae.g_Armatimonas           | 0        | 0        | 3.44E-05 | 0.5997  |
| k_Bacteria_p_Chlamydiae.c_Chlamydia.o_Chlamydiales.f_Rhabdochlamydiaceae.g_Candidatus.Rhabdochlamydia     | 0        | 0        | 3.44E-05 | 0.5997  |
| k_Bacteria_p_Proteobacteria.c_Gammaproteobacteria.o_Salinisphaerales.f_Salinisphaeraceae.g_Salinisphaera  | 0        | 9.57E-06 | 0.00136  | 0.60172 |
| k_Bacteria_p_Firmicutes.c_Clostridia.o_Clostridiales.f_Lachnospiraceae.g                                  | 0.00105  | 0.00239  | 0.00126  | 0.61075 |
| k_Bacteria_p_Firmicutes.c_Bacilli.o_Lactobacillales.f_Aerococcaceae.g                                     | 0        | 0.00022  | 0.00011  | 0.61076 |
| k_Bacteria_p_Firmicutes.c_Bacilli.o_Bacillales.f_Staphylococcaceae.g_jeotgaliococcus                      | 0        | 9.57E-06 | 0.00018  | 0.61451 |
| k_Bacteria_p_Proteobacteria.c_Deltaproteobacteria.o_Myxococcales.f_g                                      | 0        | 9.57E-06 | 0.00013  | 0.62019 |
| k_Bacteria_p_Firmicutes.c_Bacilli.o_Bacillales.f_Planococcaceae.g                                         | 0.00383  | 0.0048   | 0.00358  | 0.6202  |
| k_Bacteria_p_Proteobacteria.c_Alphaproteobacteria.o_Rhizobiales.f_Bradyrhizobiaceae.Other                 | 0        | 5.7E-05  | 0.00011  | 0.62142 |
| k_Bacteria_p_Bacteroidetes.c_Flavobacteria.o_Flavobacteriales.f_Flavobacteriaceae.g_Capnocytophaga        | 0.00049  | 0        | 0.00073  | 0.62412 |
| k_Bacteria_p_Actinobacteria.c_Actinobacteria.o_Actinomycetales.f_Gordoniaceae.g_Gordonia                  | 1.91E-05 | 0.00016  | 0.00013  | 0.63502 |
| k_Bacteria_p_Firmicutes.c_Bacilli.Other.Other                                                             | 0        | 9.57E-06 | 5.7E-06  | 0.64537 |
| k_Bacteria_p_Proteobacteria.c_Betaproteobacteria.o_f_g                                                    | 0        | 0.00014  | 8.6E-05  | 0.64537 |
| k_Bacteria_p_TM7.c_TM7.1.o_f_g                                                                            | 2.9E-05  | 0        | 0.00015  | 0.65006 |
| k_Bacteria_p_Proteobacteria.c_Alphaproteobacteria.o_Sphingomonadales.f_Sphingomonadaceae.Other            | 9.57E-06 | 0        | 4.59E-05 | 0.65579 |
| k_Bacteria_p_Actinobacteria.c_Actinobacteria.o_Actinomycetales.f_Dietziaceae.g_Dietzia                    | 0        | 4.8E-05  | 0.00022  | 0.65709 |
| k_Bacteria_p_Firmicutes.c_Clostridia.o_Clostridiales.f_Clostridiaceae.Other                               | 9.57E-06 | 2.9E-05  | 0.00019  | 0.65842 |
| k_Bacteria_p_Actinobacteria.c_Actinobacteria.o_Actinomycetales.f_Nocardioideaceae.g                       | 0        | 1.91E-05 | 8.04E-05 | 0.66292 |
| k_Bacteria_p_Firmicutes.c_Bacilli.o_Lactobacillales.f_Aerococcaceae.g_Alloiooccus                         | 1.91E-05 | 0        | 7.46E-05 | 0.66717 |
| k_Bacteria_p_SR1.c_o_f_g                                                                                  | 5.7E-05  | 0        | 5.17E-05 | 0.66736 |
| k_Bacteria_p_Proteobacteria.c_Gammaproteobacteria.o_Xanthomonadales.f_Xanthomonadaceae.g                  | 0.0002   | 0        | 0.00025  | 0.66771 |
| k_Bacteria_p_Actinobacteria.c_Actinobacteria.o_Actinomycetales.f_Actinomycetaceae.g_Actinobaculum         | 0        | 4.8E-05  | 0.00017  | 0.6741  |
| k_Bacteria_p_Cyanobacteria.c_4C0d.2.o_MLE1.12.f_g                                                         | 0        | 4.8E-05  | 0.00015  | 0.68113 |
| k_Bacteria_p_Proteobacteria.c_Gammaproteobacteria.o_Aeromonadales.f_Aeromonadaceae.g                      | 0.00081  | 0.00031  | 0.00038  | 0.6938  |
| k_Bacteria_p_Firmicutes.c_Bacilli.o_Gemellales.f_Gemellaceae.Other                                        | 0        | 9.57E-06 | 2.30E-05 | 0.69912 |
| k_Bacteria_p_Firmicutes.c_Bacilli.o_Lactobacillales.f_Enterococcaceae.g_Vagococcus                        | 0.00015  | 9.57E-06 | 0.00015  | 0.70622 |
| k_Bacteria_p_Planctomycetes.c_Planctomycetia.o_Gemmatales.f_Gemmataceae.g                                 | 0        | 8.6E-05  | 7.46E-05 | 0.71157 |
| k_Bacteria_p_Firmicutes.c_Bacilli.o_Bacillales.f_Planococcaceae.g_Rummeliibacillus                        | 0.00012  | 0        | 0.00015  | 0.71357 |
| k_Bacteria_p_Actinobacteria.c_Actinobacteria.o_Actinomycetales.f_Intrasporangiaceae.Other                 | 0        | 1.91E-05 | 1.7E-05  | 0.71569 |
| k_Bacteria_p_Proteobacteria.c_Alphaproteobacteria.o_Rhodospirillales.f_Acetobacteraceae.Other             | 9.57E-06 | 2.9E-05  | 1.1E-05  | 0.71569 |
| k_Bacteria_p_Proteobacteria.c_Alphaproteobacteria.o_Sphingomonadales.f_Sphingomonadaceae.g                | 7.7E-05  | 9.57E-06 | 0.00015  | 0.71782 |
| k_Bacteria_p_Proteobacteria.c_Gammaproteobacteria.o_Enterobacteriales.f_Enterobacteriaceae.g_Klebsiella   | 0.00021  | 0.00068  | 0.00042  | 0.71813 |
| k_Bacteria_p_Firmicutes.c_Clostridia.o_Clostridiales.Other.Other                                          | 0        | 9.57E-06 | 1.7E-05  | 0.71816 |
| k_Bacteria_p_Firmicutes.c_Clostridia.o_Clostridiales.f_Tissierellaceae.g_Anaerococcus                     | 0.03449  | 0.0322   | 0.02871  | 0.72006 |
| k_Bacteria_p_Proteobacteria.c_Deltaproteobacteria.o_Desulfovibrionales.f_Desulfovibrionaceae.Other        | 2.9E-05  | 0        | 4.59E-05 | 0.72446 |
| k_Bacteria_p_Proteobacteria.c_Betaproteobacteria.o_Burkholderiales.f_Alcaldigenaceae.g_Achromobacter      | 0        | 0.00011  | 0.00018  | 0.72446 |
| k_Bacteria_p_Proteobacteria.c_Alphaproteobacteria.o_Rhodobacteriales.f_Rhodobacteraceae.g_Amaricoccus     | 7.7E-05  | 0        | 8.04E-05 | 0.72722 |
| k_Bacteria_p_Proteobacteria.c_Betaproteobacteria.o_Rhodocyclales.f_Rhodocyclaceae.g_Zoogloea              | 0.0002   | 0        | 0.00022  | 0.72866 |
| k_Bacteria_p_Proteobacteria.c_Alphaproteobacteria.o_Rhodobacteriales.f_Rhodobacteraceae.g_Paracoccus      | 0        | 0.0002   | 0.00026  | 0.73095 |
| k_Bacteria_p_Actinobacteria.c_Actinobacteria.o_Actinomycetales.f_Microbacteriaceae.g_Microbacterium       | 0.00016  | 0.00032  | 0.00021  | 0.75145 |
| k_Bacteria_p_Firmicutes.c_Bacilli.o_Bacillales.f_Bacillaceae.Other                                        | 7.65E-05 | 3.83E-05 | 0.00019  | 0.7577  |
| k_Bacteria_p_Firmicutes.c_Bacilli.o_Lactobacillales.f_Enterococcaceae.Other                               | 0.00116  | 0.00172  | 0.00098  | 0.76476 |
| k_Bacteria_p_Firmicutes.c_Bacilli.o_Bacillales.Other.Other                                                | 0.00061  | 0.00037  | 0.0005   | 0.76886 |
| k_Bacteria_p_Firmicutes.c_Bacilli.o_Lactobacillales.f_Lactobacillaceae.g_Lactobacillus                    | 0.00108  | 0.00072  | 0.00062  | 0.76961 |
| k_Bacteria_p_Firmicutes.c_Clostridia.o_Clostridiales.f_Ruminococcaceae.g_Ruminococcus                     | 0.00011  | 0.00033  | 0.00037  | 0.77236 |
| k_Bacteria_p_Proteobacteria.c_Betaproteobacteria.o_Burkholderiales.f_Burkholderiaceae.g_Lautropia         | 0.00018  | 2.9E-05  | 0.00017  | 0.79238 |
| k_Bacteria_p_Firmicutes.c_Clostridia.o_Clostridiales.f_Tissierellaceae.g_Peptoniphilus                    | 0.00599  | 0.00718  | 0.00749  | 0.79388 |
| k_Bacteria_p_Actinobacteria.c_Actinobacteria.o_Actinomycetales.Other.Other                                | 0.00034  | 0.00077  | 0.00055  | 0.80237 |
| k_Bacteria_p_Proteobacteria.c_Alphaproteobacteria.o_Rhizobiales.f_Bradyrhizobiaceae.g                     | 8.6E-05  | 3.8E-05  | 0.00014  | 0.84204 |
| k_Bacteria_p_Firmicutes.c_Clostridia.o_Clostridiales.f_Lachnospiraceae.g_Moryella                         | 0.00221  | 0.00162  | 0.00163  | 0.8713  |
| k_Bacteria_p_Bacteroidetes.c_Sphingobacteriales.f_Sphingobacteriaceae.g_Sphingobacterium                  | 0.00052  | 0.00094  | 0.0006   | 0.88634 |
| k_Bacteria_p_Firmicutes.c_Clostridia.o_Clostridiales.f_Tissierellaceae.g_Finogoldia                       | 0.00685  | 0.00569  | 0.00666  | 0.91703 |
| k_Bacteria_p_Bacteroidetes.c_Bacteroidia.o_Bacteroidales.f_Bacteroidaceae.g_Bacteroides                   | 0.00154  | 0.00213  | 0.00154  | 0.92707 |
| k_Bacteria_p_Proteobacteria.c_Alphaproteobacteria.o_Rhizobiales.f_Methylobacteriaceae.g_Methylobacterium  | 0.00033  | 0.00028  | 0.00024  | 0.9394  |
| k_Bacteria_p_Actinobacteria.c_Actinobacteria.o_Actinomycetales.f_Propionibacteriaceae.g_Propionibacterium | 0.00124  | 0.00126  | 0.00142  | 0.94828 |
| k_Bacteria_p_Proteobacteria.c_Gammaproteobacteria.o_Xanthomonadales.f_Xanthomonadaceae.g_Stenotrophomonas | 0.00205  | 0.00242  | 0.00219  | 0.96167 |
| k_Bacteria_p_Proteobacteria.c_Alphaproteobacteria.o_Rhizobiales.f_Phyllobacteriaceae.g_Phyllobacterium    | 0.00022  | 0.00024  | 0.00028  | 0.9742  |
| k_Bacteria_p_Bacteroidetes.c_Flavobacteria.o_Flavobacteriales.f_Weeksellaceae.g_Chryseobacterium          | 0.00079  | 0.00068  | 0.00086  | 0.97589 |



**Supplementary Table S2. Primer sequences for DGGE, 16S Illumina high-throughput sequencing and qPCR-amplified genes.**

| <b>Target Gene</b>                    | <b>Forward primer sequence (5' - 3')</b>                                                                | <b>Reverse primer sequence (5' - 3')</b>                                           |
|---------------------------------------|---------------------------------------------------------------------------------------------------------|------------------------------------------------------------------------------------|
| <b>16S rRNA gene (PCR - DGGE)</b>     | (P3_GC-341F)<br>5'-CGC CCG CCG GGC GCG GCG GGC GGG<br>GCG GGG GCA CGG GGG GCC TAC GGG<br>AGG CAG CAG-3' | (P2_518R)<br>5'-ATT ACC GCG GCT GCT GG-3'                                          |
| <b>16S rRNA gene (PCR - Illumina)</b> | 5'-TCG TCG GCA GCG TCA GAT GTC TAT<br>AAG AGA CAG CCT ACG GGN GGC WGC AG-3'                             | 5'-GTC TCG TGG GCT CGG AGA TGT GTA TAA GAG<br>ACA GGA CTA CHV GGG TAT CTA ATC C-3' |
| <b>Eubacterial Universal 16S</b>      | 5'-ACT CCT ACG GGA GGC AGC AGT-3'                                                                       | 5'-ATT ACC GCG GCTGCT GGC-3'                                                       |
| <b><i>P. aeruginosa</i></b>           | 5'-TTC CCT TGA TCA GGT CGA TCT-3'                                                                       | 5'-CCT GGT TGA TCA GGT CGA TCT-3'                                                  |
| <b><i>P. acnes</i></b>                | 5'-ATA CGT AGG GTG CGA GCG TTG TCC-3'                                                                   | 5'-TGG TGT TCC TCC TGA TAT CTG CGC-3'                                              |
| <b><i>S. aureus</i></b>               | 5'-GCG ATT GAT GGT GAT ACG GTT-3'                                                                       | 5'-AGC CAA GCC TTG ACG AAC TAA-3'                                                  |
| <b><i>S. epidermidis</i></b>          | 5'-TCA GCA GTT GAA GGG ACA GAT-3'                                                                       | 5'-CCA GAA CAA TGA ATG GTT AAG G-3'                                                |
| <b><i>mBD-1</i></b>                   | 5'-TTT CAC ATC CTC TCT GCA CT-3'                                                                        | 5'-ACC TGG CTC CAT CTG GGA GA-3'                                                   |
| <b><i>mBD-3</i></b>                   | 5'-CTC TTT GCA TTT CTC CTG GTG CTG<br>CTG-3'                                                            | 5'-CAT CTT CAT GGA GGA GCA AAT TCT G-3'                                            |
| <b><i>mBD-14</i></b>                  | 5'-ATC CAG ATC TGG GTA CCG ACG ACG<br>ACG ACA ACT TCC TAC CAA AAA CCC TCC-<br>3'                        | 5'-ATT TGC GGG CGC CTA CTT CTT CTT TCG GCA<br>GC-3'                                |
| <b><i>mIL-22</i></b>                  | 5'-AGC TTG AGG TGT CCA ACT TC-3'                                                                        | 5'-GGT AGC ACT CAT CCT TAG CAC TG-3'                                               |
